# Supplementary material
Source: Research Square preprint supplement (doi:10.21203/rs.3.rs-9571045/v1)
Supplement: Supplementary file 1 [file af7d9eda2ef3a8231fba6795.docx]

**Reactive transport modelling of element leach behavior in high-level radioactive waste disposal glass**

Ping Chena, Shengchao Lia, Mingfang Zhoua, Dongsheng Xua, Chengming Shanga, Duo Zhoua, Guoxin Tiana, Shengheng Tana, *, Yu Zhanga, *

a*Department of Radiochemistry, China Institute of Atomic Energy, Beijing 102413, China*

** Corresponding author*

**Table S1.** Chemical composition of the glass form

| Component | wt% |
| --- | --- |
| SiO2 | 45.04 |
| B2O3 | 13.04 |
| Na2O | 7.63 |
| Li2O | 2.00 |
| CaO | 9.84 |
| Al2O3 | 2.00 |
| TiO2 | 2.00 |
| BaO | 1.00 |
| CdO | 0.15 |
| Ce2O3 | 1.84 |
| Cs2O | 1.30 |
| La2O3 | 0.70 |
| MoO3 | 2.55 |
| Nd2O3 | 2.94 |
| SeO2 | 0.03 |
| Sm2O3 | 0.12 |
| SnO | 0.13 |
| SrO | 0.08 |
| TeO2 | 0.29 |
| Y2O3 | 0.27 |
| ZrO3 | 2.87 |
| PdO | 0.88 |
| Pr2O3 | 0.11 |
| Rb2O | 0.23 |
| Ru2O3 | 1.77 |
| MnO2 | 0.58 |
| UO3 | 0.35 |

Fig S1**. Impact of factors effective diffusion coefficient, De, on leached Si, B and U in solution. a) De of U influence on Si; b) De of U influence on B; c) De of U influence on U.**


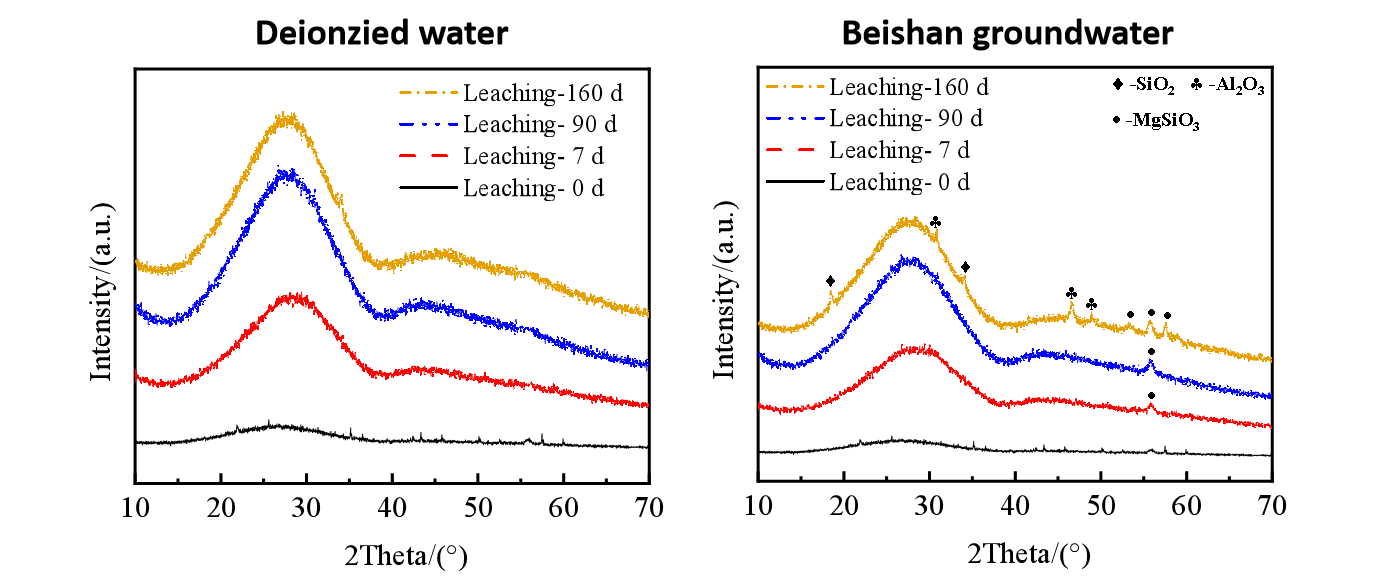


**Fig S2. The XRD patterns from leached glasses under different immersion solutions. XRD patterns reveal that under deionized water soaking, the initial structure of the glass solidified body remains stable, with bridge oxygens (B-O-B/Si-O-Si) predominating in the network**
